# Supplementary material for: Polymerizable Choline- and Imidazolium-Based Ionic Liquids Reinforced with Bacterial Cellulose for 3D-Printing
Source: MDPI journal article supplement (doi:10.3390/polym13183044), 2021-09-09
Supplement: s1 [file s1]

ELECTRONIC SUPPLEMENTARY INFORMATION FOR

# Polymerizable Choline- and Imidazolium-Based Ionic Liquids Reinforced with Bacterial Cellulose for 3D-Printing

Michael A. Smirnov <sup>1,2,\*</sup>, Veronika S. Fedotova <sup>1,2</sup>, Maria P. Sokolova <sup>1</sup>, Alexandra L. Nikolaeva <sup>1</sup>, Vladimir Yu. Elokhovsky <sup>1</sup> and Mikko Karttunen <sup>1,3,4,5,\*</sup>

<sup>1</sup> Institute of Macromolecular Compounds, Russian Academy of Sciences, V.O. Bolshoi pr. 31, 199004 St. Petersburg, Russia

<sup>2</sup> Institute of Chemistry, Saint Petersburg State University, Universitetsky pr. 26, Peterhof, 198504 St. Petersburg, Russia

<sup>3</sup> Department of Chemistry, The University of Western Ontario, 1151 Richmond Street, London, ON N6A 5B7, Canada

<sup>4</sup> Department of Physics and Astronomy, The University of Western Ontario, 1151 Richmond Street, London, ON N6A 5B7, Canada

<sup>5</sup> The Centre of Advanced Materials and Biomaterials Research, The University of Western Ontario, 1151 Richmond Street, London, ON N6A 5B7, Canada

\* Correspondence: Smirnov\_Michael@mail.ru (M.A.S.); mkarttu@uwo.ca (M.K.)

## 1. AFM Measurements

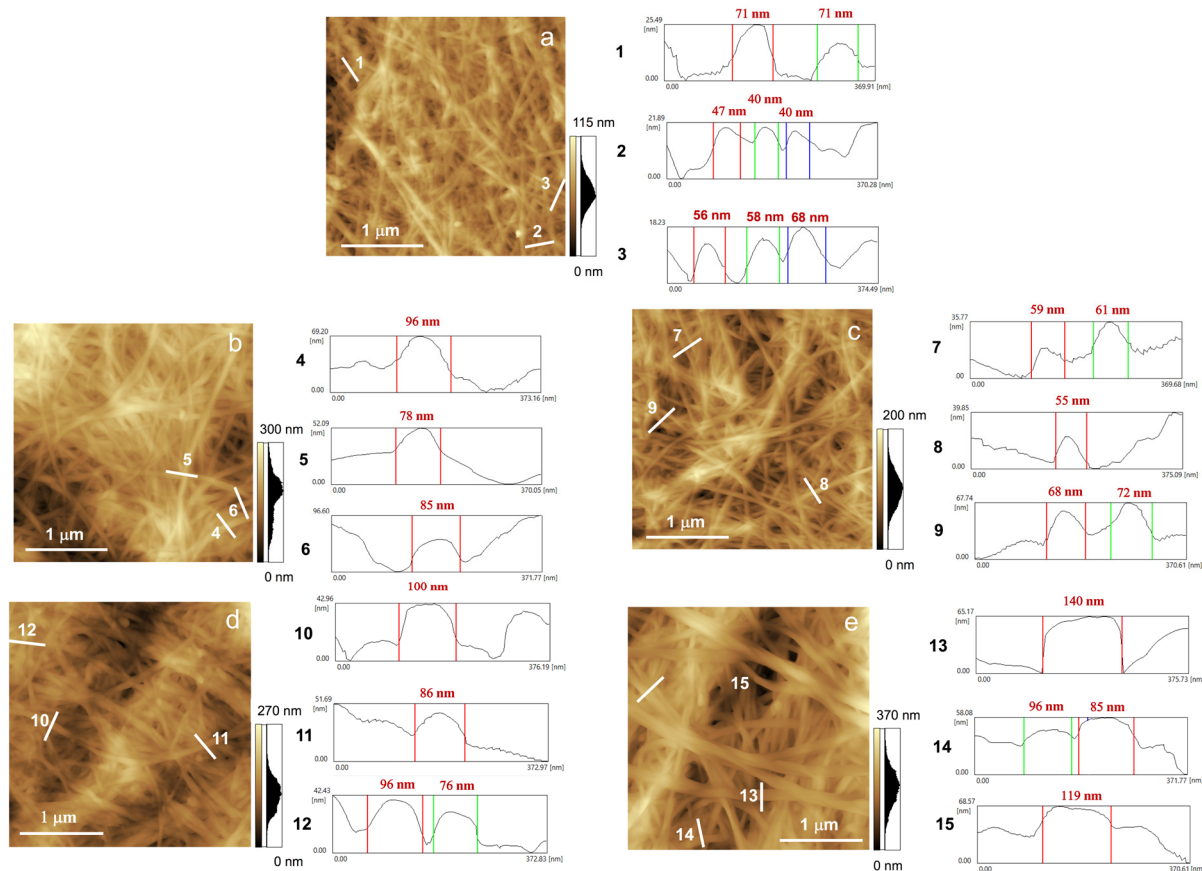

**Figure S1.** Profiles extracted from surface topography maps of initial BC (a), BC after AA/ImCl (b) and after AA/ChCl (c), BC-PAA from AA/ImCl (d) and from AA/ChCl (e).

## 2. Extrusion of CNF through Nozzle

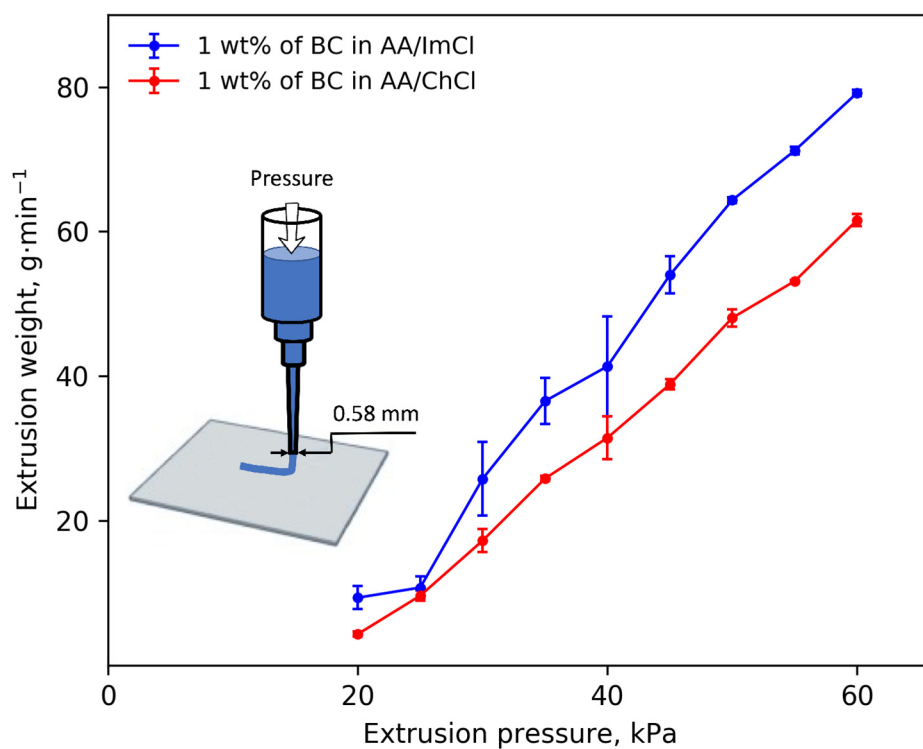

**Figure S2.** Dependence of extrusion weight on extrusion pressure for compositions containing 1 wt% of BC through nozzle of diameter of 0.58 mm. Each point was measured 3-5 times.

## 3. Mechanical Properties

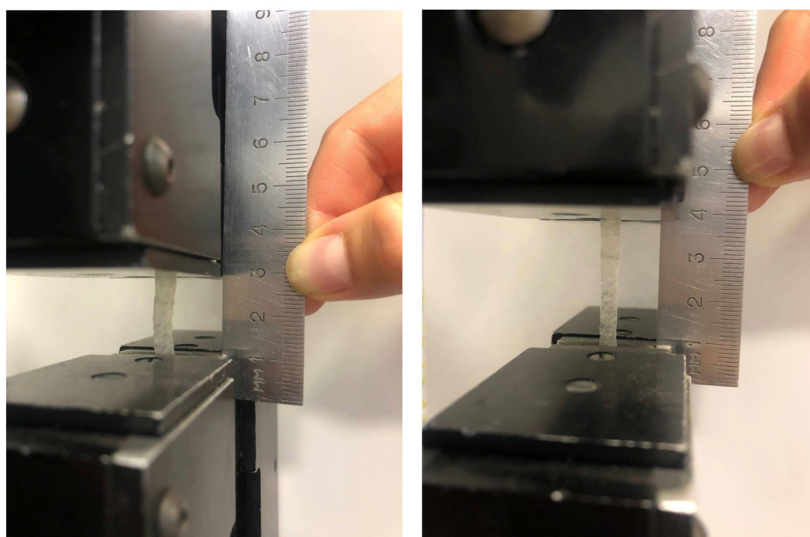

**Figure S3.** Images of ion gel stretched in mechanical testing machine.
